# Supplementary material for: Characterization and Cellular Internalization of Spherical Cellulose Nanocrystals (CNC) into Normal and Cancerous Fibroblasts
Source: Materials (Basel). 2019 Oct 4;12(19):3251. doi: 10.3390/ma12193251 (PMC6803863; doi:10.3390/ma12193251)
Supplement: Supplementary file 1 [file materials-12-03251-s001.pdf]

## Supplementary materials:

# Characterization and Cellular Internalization of Spherical Cellulose Nanocrystals (CNC) into Normal and Cancerous Fibroblasts

Nur Aima Hafiza Shazali <sup>1</sup>, Noorzaileen Eileena Zaidi <sup>2</sup>, Hidayah Ariffin <sup>1,3</sup>,  
Luqman Chuah Abdullah <sup>4</sup>, Ferial Ghaemi <sup>1</sup>, Jafri Malin Abdullah <sup>5</sup>, Ichiro  
Takashima <sup>6</sup> and Nik Mohd Afizan Nik Abd. Rahman <sup>1,2,\*</sup>

<sup>1</sup> Institute of Tropical Forestry and Forest Products (INTROP), Universiti Putra Malaysia, 43400 Serdang, Selangor, Malaysia

<sup>2</sup> Department of Cell and Molecular Biology, Faculty of Biotechnology and Biomolecular Sciences, Universiti Putra Malaysia, 43400 Serdang, Selangor, Malaysia

<sup>3</sup> Department of Bioprocess, Faculty of Biotechnology and Biomolecular Sciences, Universiti Putra Malaysia, 43400 Serdang, Selangor, Malaysia

<sup>4</sup> Department of Chemical and Environmental Engineering, Faculty of Engineering, Universiti Putra Malaysia, 43400 Serdang, Selangor, Malaysia

<sup>5</sup> Brain Mapping and Neuroinformatics Unit, Centre for Neuroscience Services and Research (P3Neuro), Health Campus, Universiti Sains Malaysia, 16150 Kubang Kerian, Kelantan, Malaysia

<sup>6</sup> Human Informatics Research Institute, National Institute of Advanced Industrial Science and Technology (AIST), Tsukuba, Ibaraki 305-8568, Japan

\* Correspondence: m.afizan@upm.edu.my; +603-9769 1944

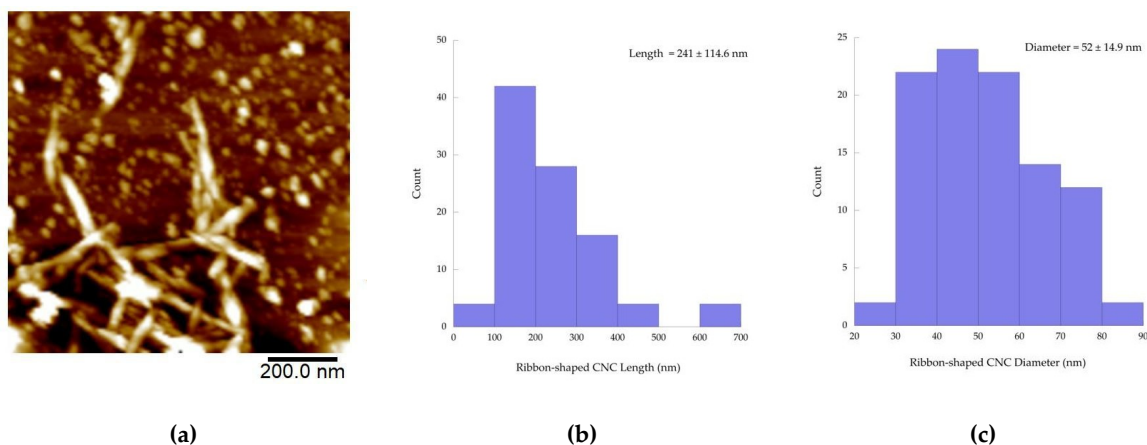

**Figure S1.** (a) AFM micrograph showing the co-existence of ribbon-shaped and spherical CNC. Histograms of (b) ribbon-shaped CNC length and (c) ribbon-shaped CNC diameter and their respective averages.
